# Supplementary material for: Prevalence of neurogenetic disorders in the North of England
Source: PubMed Central journal article supplement (PMC4607600; doi:10.1212/wnl.0000000000001995), 2015-10-06
Supplement: supp_WNL.0000000000001995_Appendix_e-1.pdf [file supp_WNL.0000000000001995_Appendix_e-1.pdf]

## Population in the north of england region

| County, Borough               | 2001           | 2002           | 2003           | 2004           |
|-------------------------------|----------------|----------------|----------------|----------------|
| <b>Northumberland</b>         | 307363         | 308499         | 309448         | 310140         |
| <b>Tyne and Wear</b>          | 1086816        | 1086546        | 1084723        | 1082774        |
| <b>Cumbria</b>                | 487795         | 488681         | 491329         | 494918         |
| <b>County Durham</b>          | 493678         | 493538         | 493931         | 495147         |
| Darlington                    | 97894          | 98474          | 98911          | 99343          |
| Hartlepool                    | 90152          | 89993          | 90134          | 90317          |
| Stockton-on-Tees              | 183795         | 184940         | 185699         | 185687         |
| <b>North Yorkshire (part)</b> |                |                |                |                |
| Middlesbrough                 | 141233         | 140090         | 139050         | 138451         |
| Redcar and Cleveland          | 139159         | 138520         | 138565         | 138643         |
| <b>TOTAL</b>                  | <b>3027885</b> | <b>3029281</b> | <b>3031790</b> | <b>3035420</b> |

All data from Office for National Statistics. Population Estimates for UK, England and Wal

| <b>Population, mid-year</b> |             |             |             |             |             |             |
|-----------------------------|-------------|-------------|-------------|-------------|-------------|-------------|
| <b>2005</b>                 | <b>2006</b> | <b>2007</b> | <b>2008</b> | <b>2009</b> | <b>2010</b> | <b>2011</b> |
| 310752                      | 311375      | 312960      | 314057      | 314489      | 315463      | 316278      |
| 1085369                     | 1086495     | 1089457     | 1091129     | 1094638     | 1100024     | 1104141     |
| 497040                      | 498813      | 500779      | 500916      | 500786      | 500165      | 499817      |
| 497218                      | 499348      | 502960      | 505617      | 507311      | 510628      | 512994      |
| 100287                      | 101509      | 102632      | 103694      | 104355      | 105028      | 105584      |
| 90457                       | 90781       | 90969       | 91379       | 91530       | 91773       | 92088       |
| 186350                      | 187270      | 187937      | 189039      | 189978      | 190902      | 191824      |
| 138517                      | 138169      | 138190      | 137885      | 137273      | 137667      | 138368      |
| 138177                      | 137621      | 136940      | 136512      | 135867      | 135383      | 135164      |
| 3044167                     | 3051381     | 3062824     | 3070228     | 3076227     | 3087033     | 3096258     |

les, Scotland and Northern Ireland. Access from: <http://www.ons.gov.uk/ons/publications/all-rel>

| <b>2012</b> | <b>2013</b> |
|-------------|-------------|
| 316116      | 315806      |
| 1108212     | 1113577     |
| 499104      | 498070      |
| 514348      | 515957      |
| 105248      | 105396      |
| 92238       | 92665       |
| 192406      | 193196      |
|             |             |
| 138744      | 138939      |
| 134998      | 134945      |
|             |             |
| 3101414     | 3108551     |

[eases.html?definition=tcm%3A77-22371.](#)
